# Supplementary figures and images for: ECM proteins and cationic polymers coating promote dedifferentiation of patient-derived mature adipocytes to stem cells
Source: Royal Society of Chemistry journal article supplement (doi:10.1039/d3bm00934c), 2023-01-01

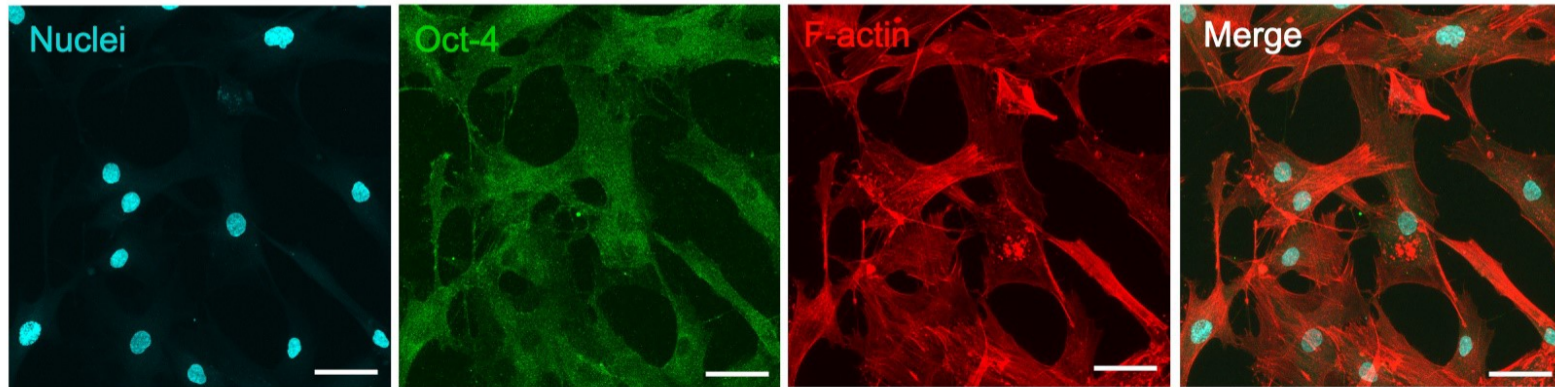

Supplement: d3bm00934c2.pdf [file d3bm00934c2.pdf]

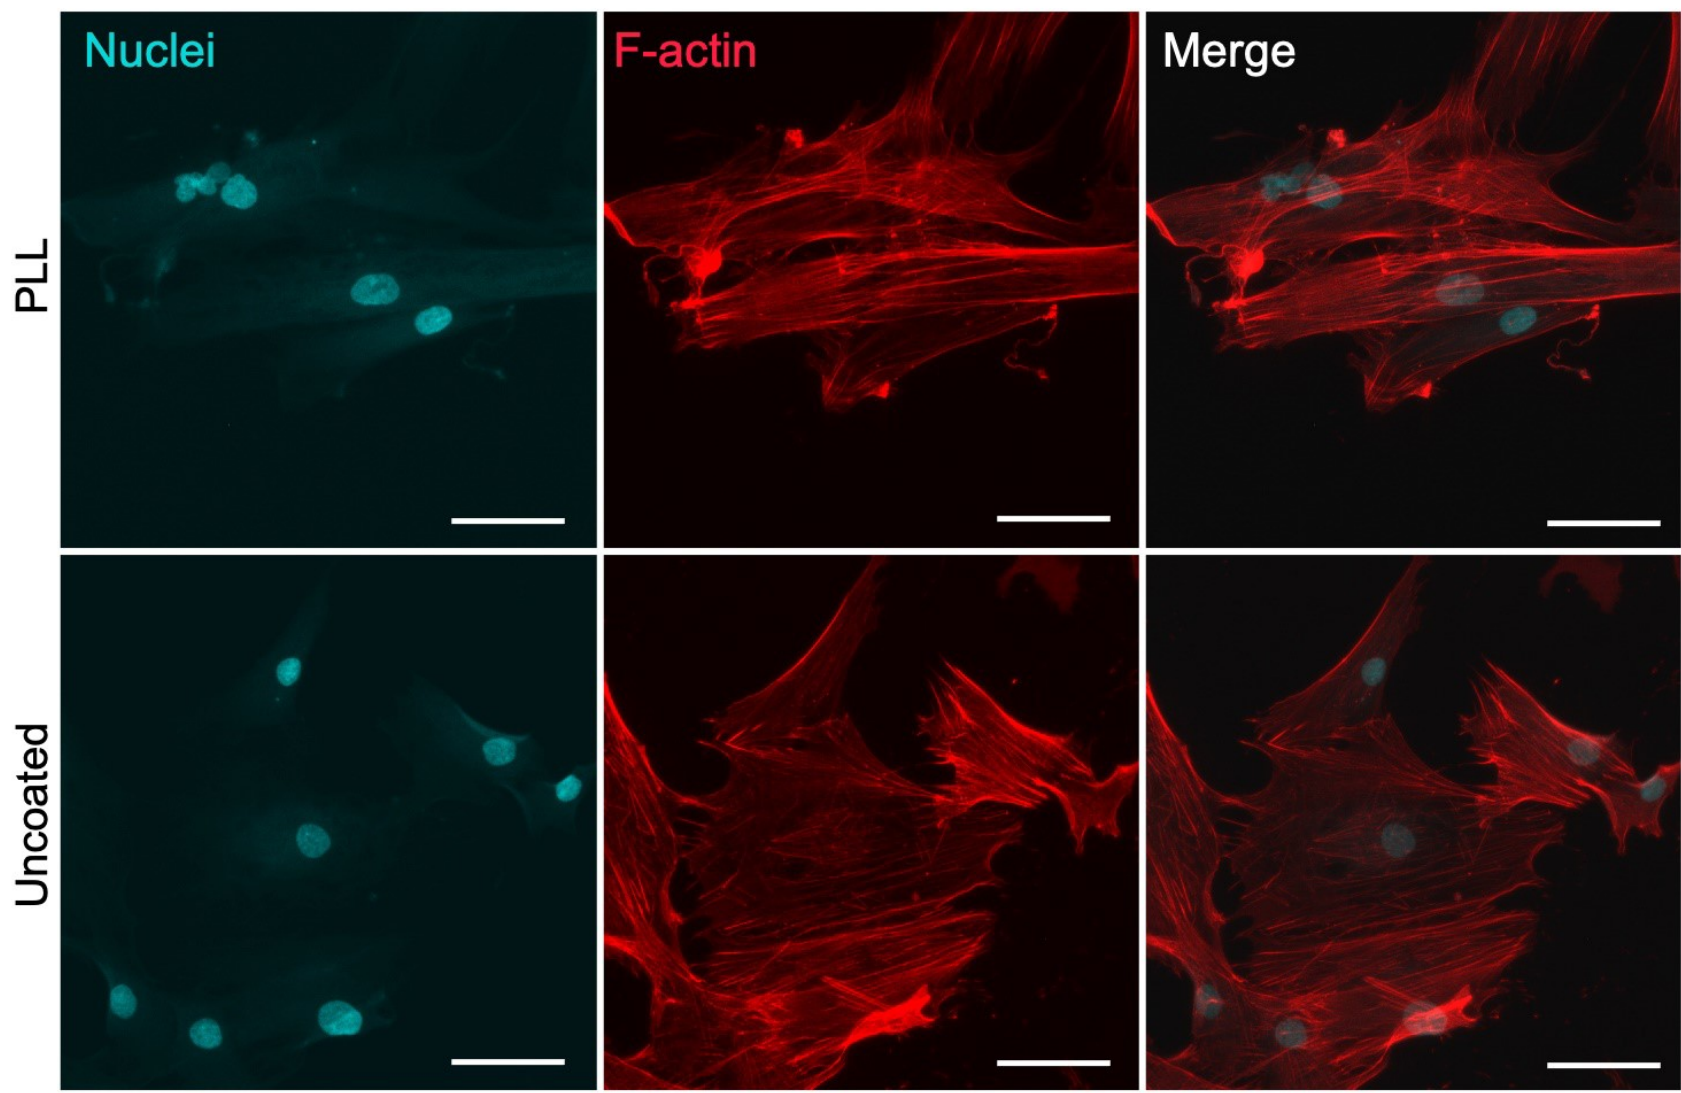

Supplement: d3bm00934c3.pdf [file d3bm00934c3.pdf]

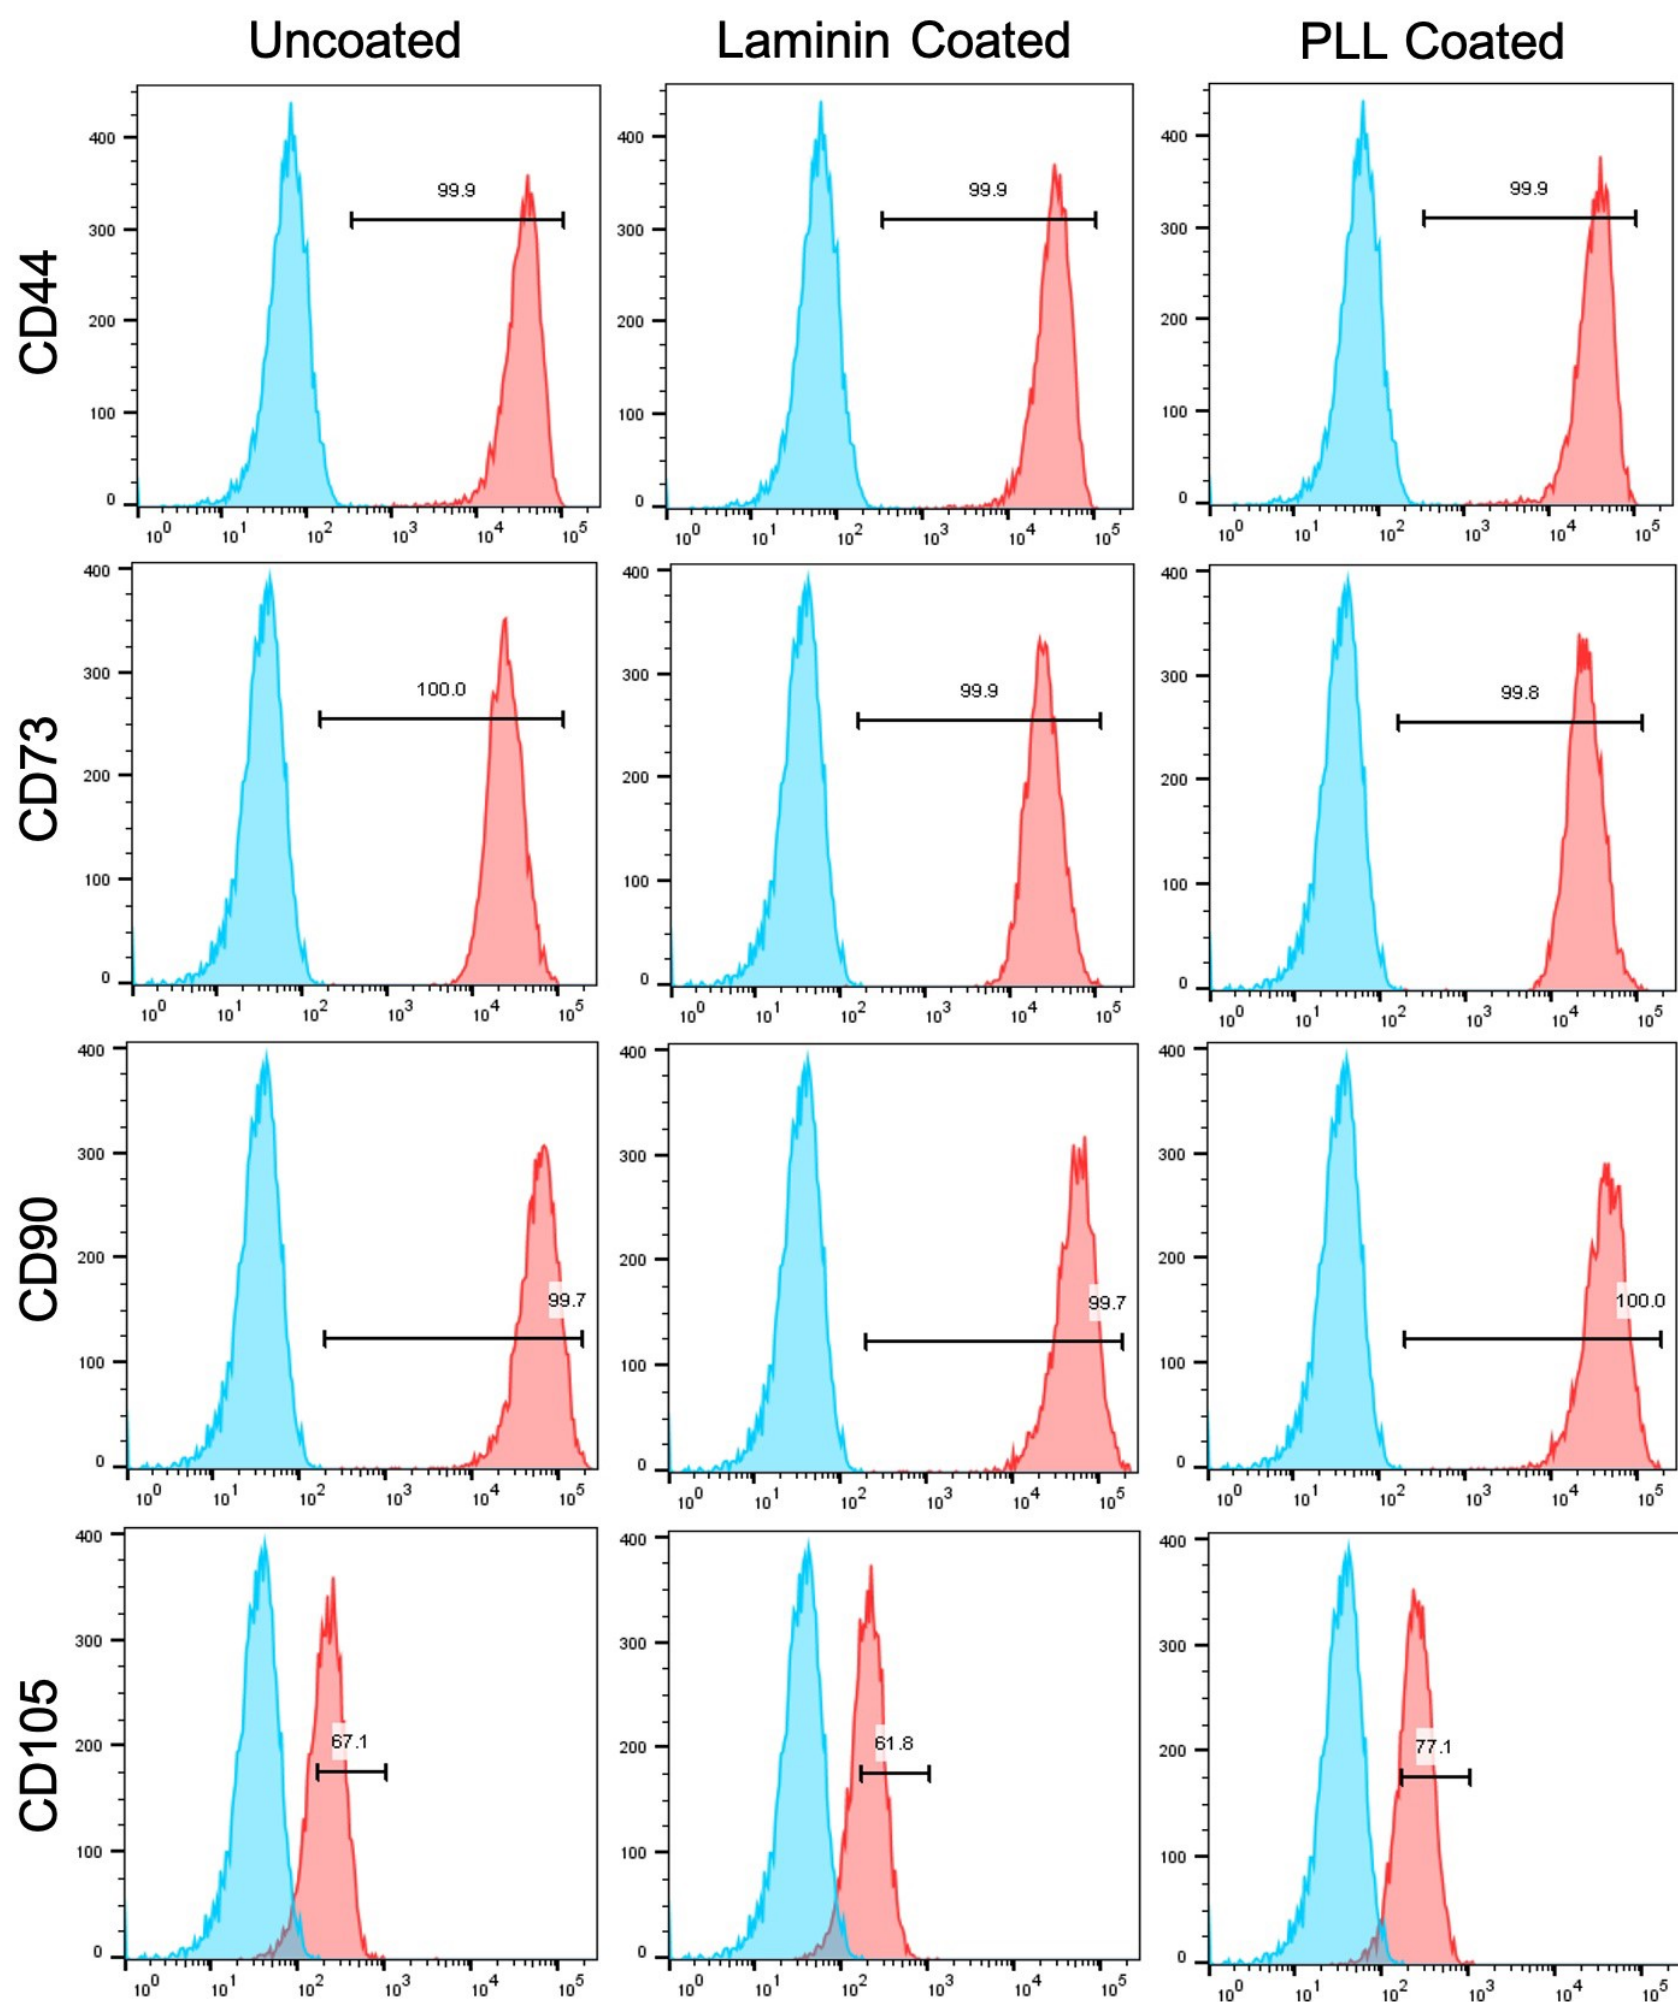

Supplement: d3bm00934c4.pdf [file d3bm00934c4.pdf]

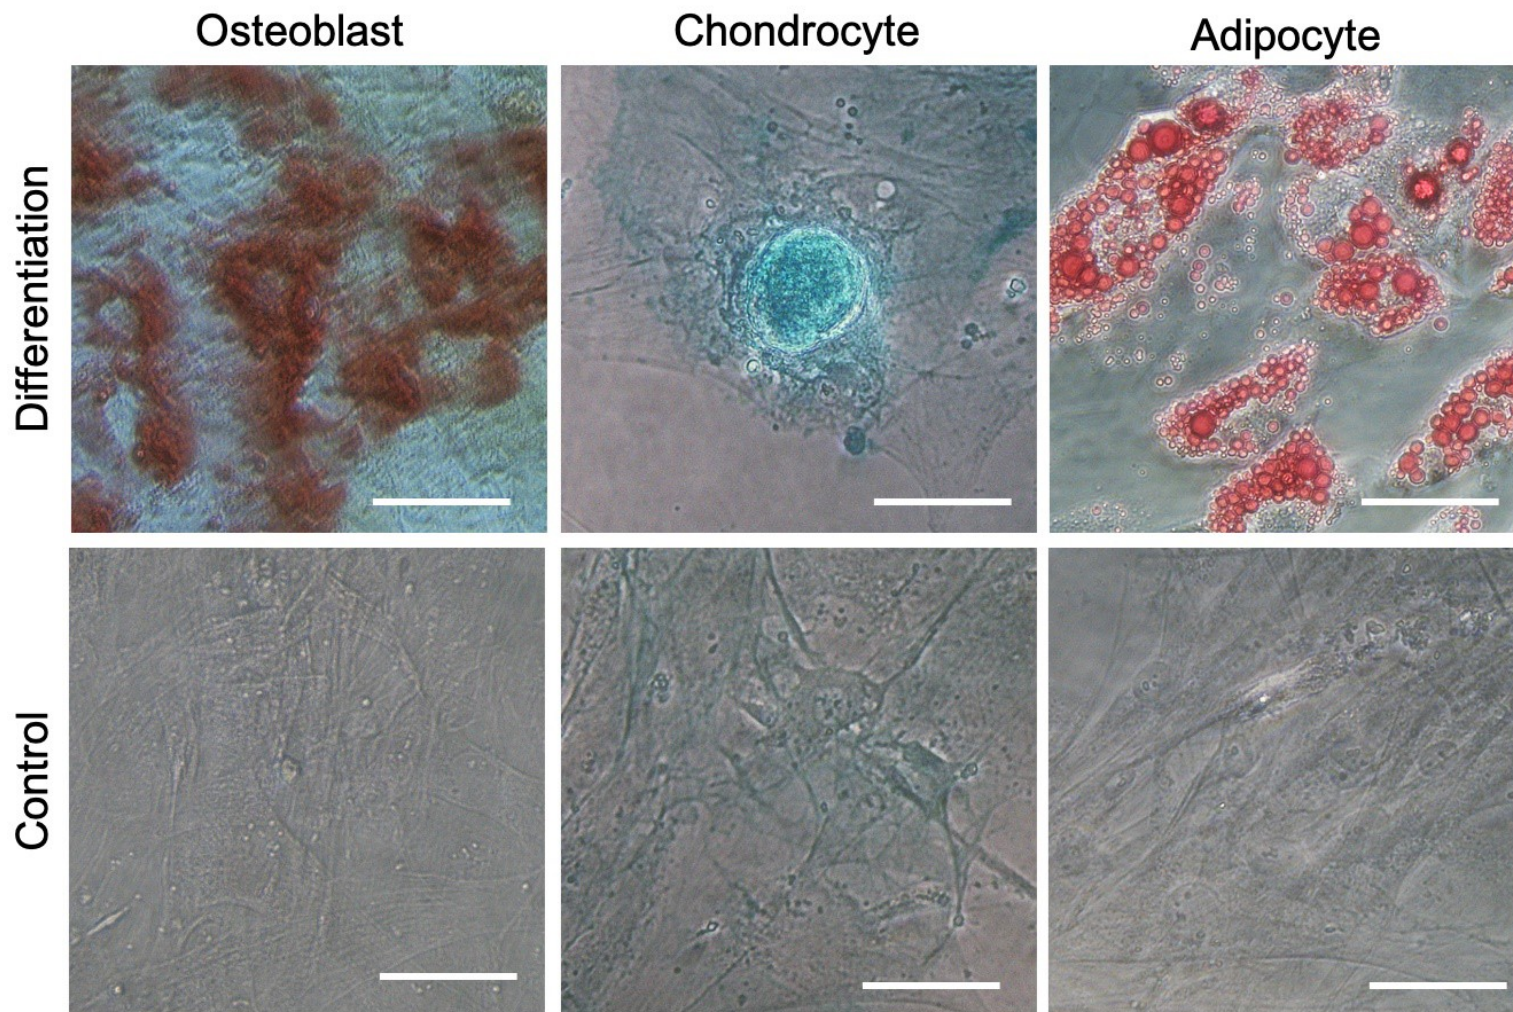

Supplement: d3bm00934c5.pdf [file d3bm00934c5.pdf]

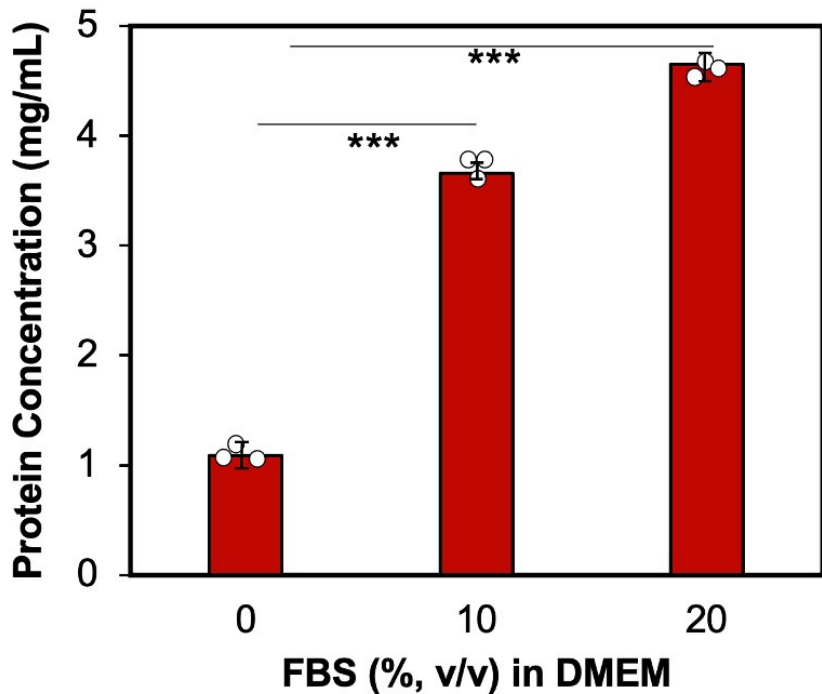

Supplement: d3bm00934c6.pdf [file d3bm00934c6.pdf]

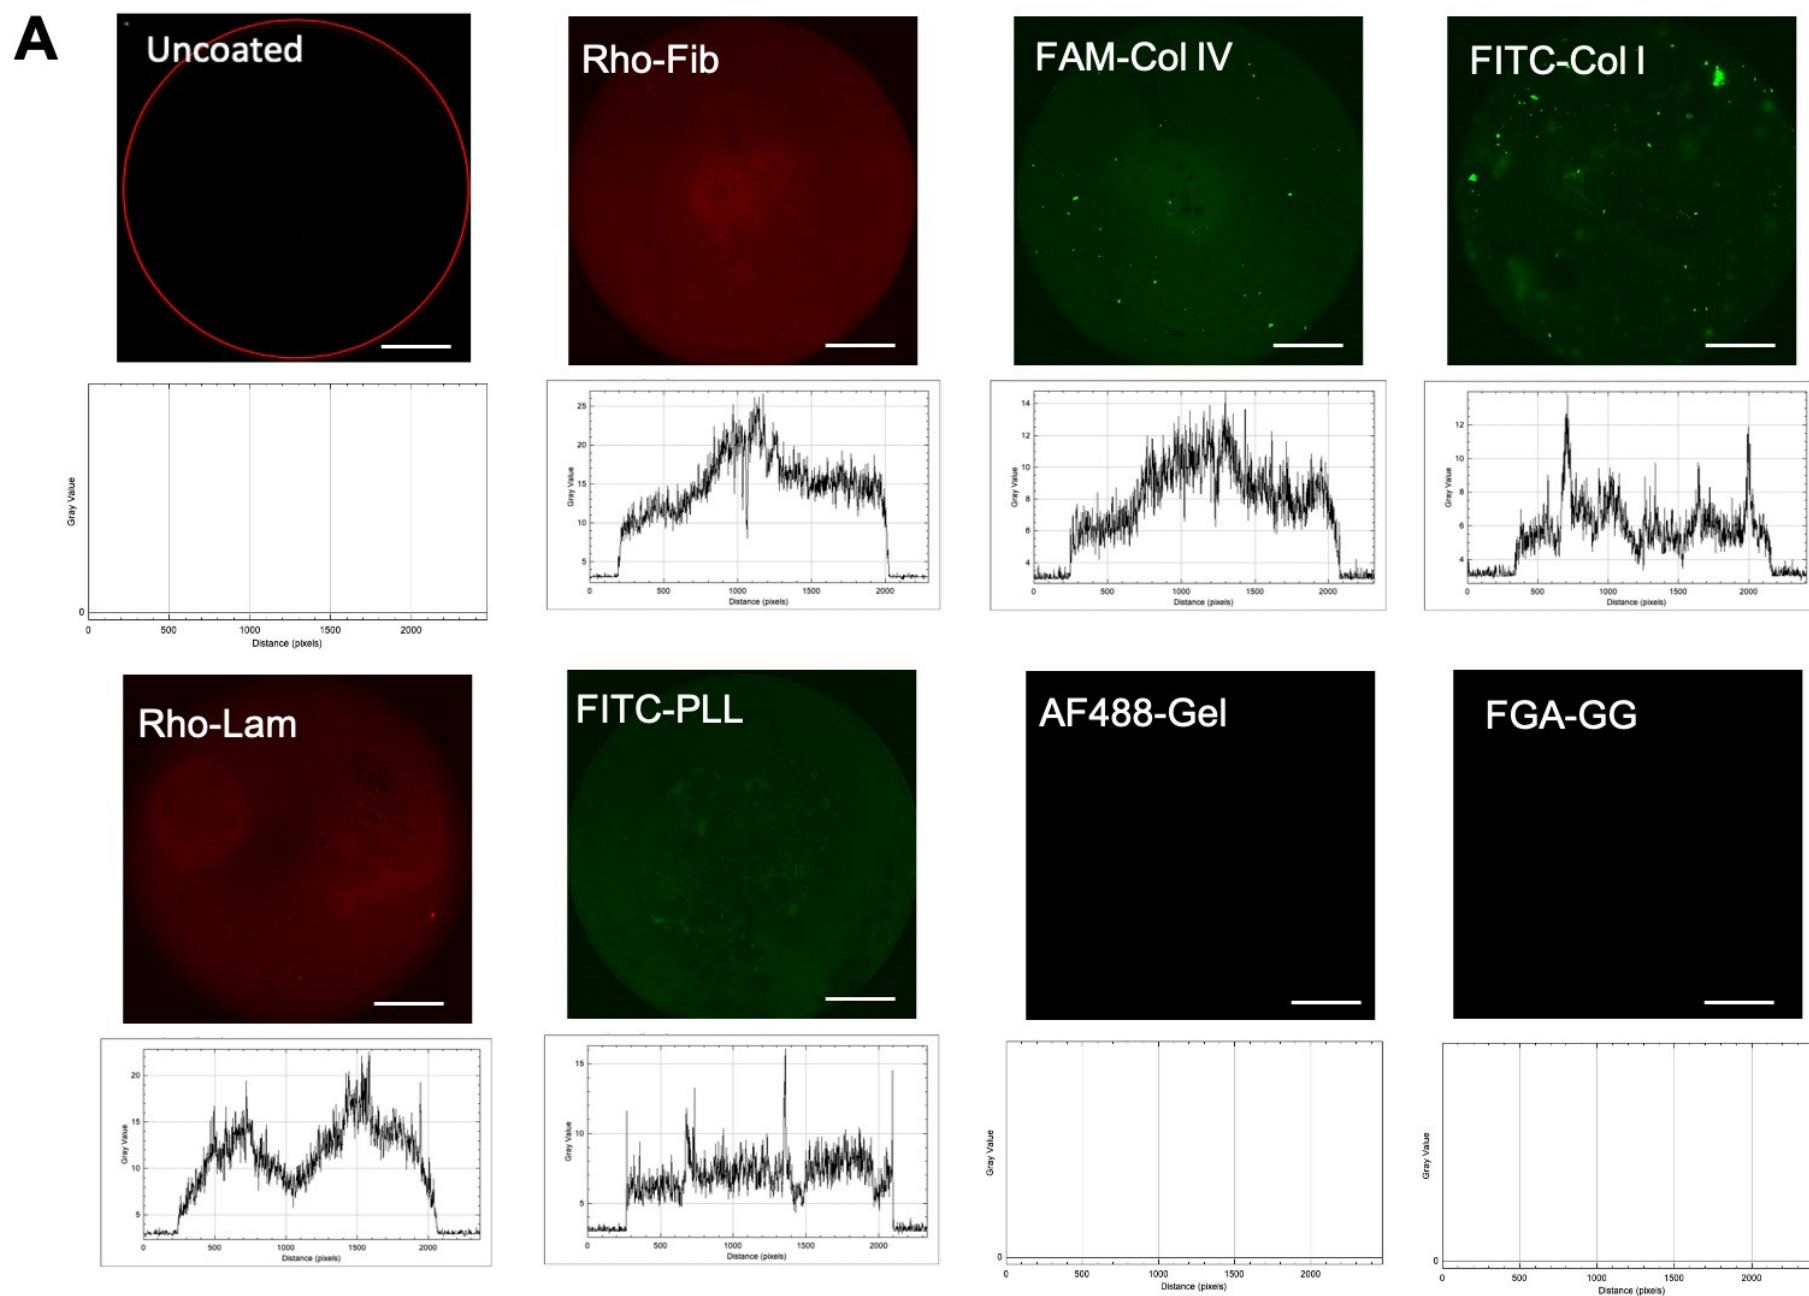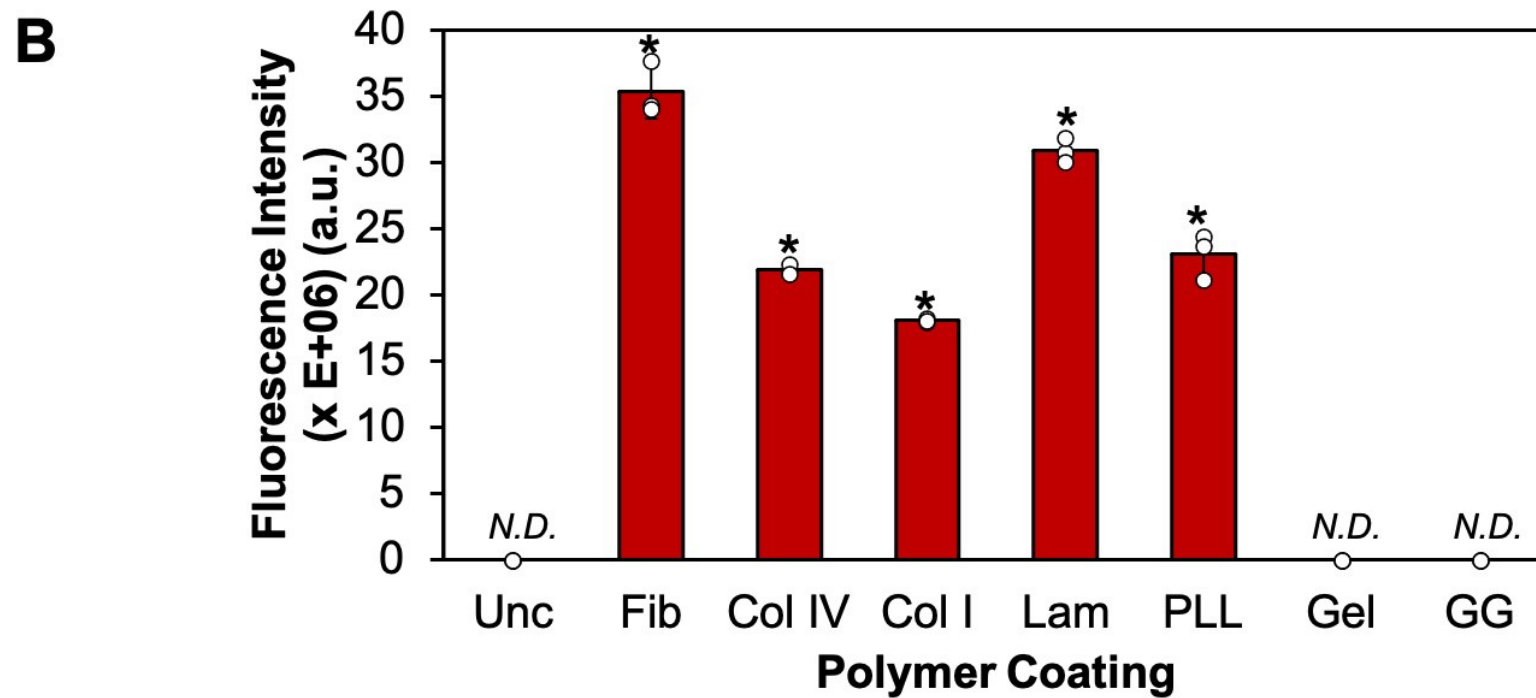

Supplement: d3bm00934c7.pdf [file d3bm00934c7.pdf]

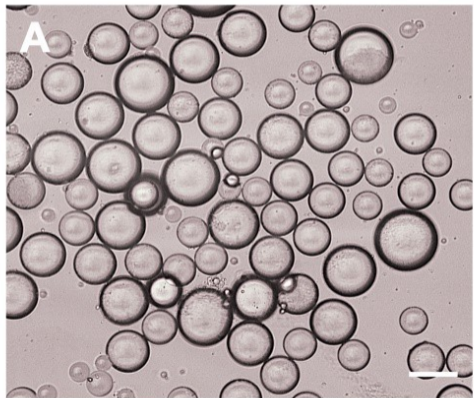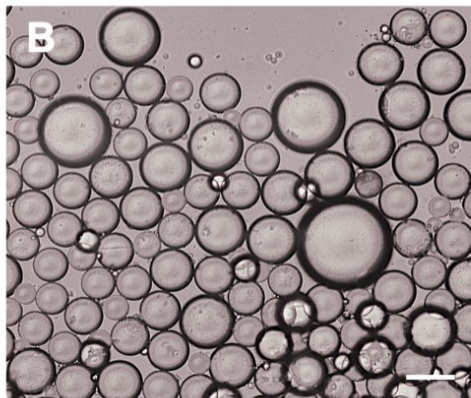

Supplement: d3bm00934c8.pdf [file d3bm00934c8.pdf]

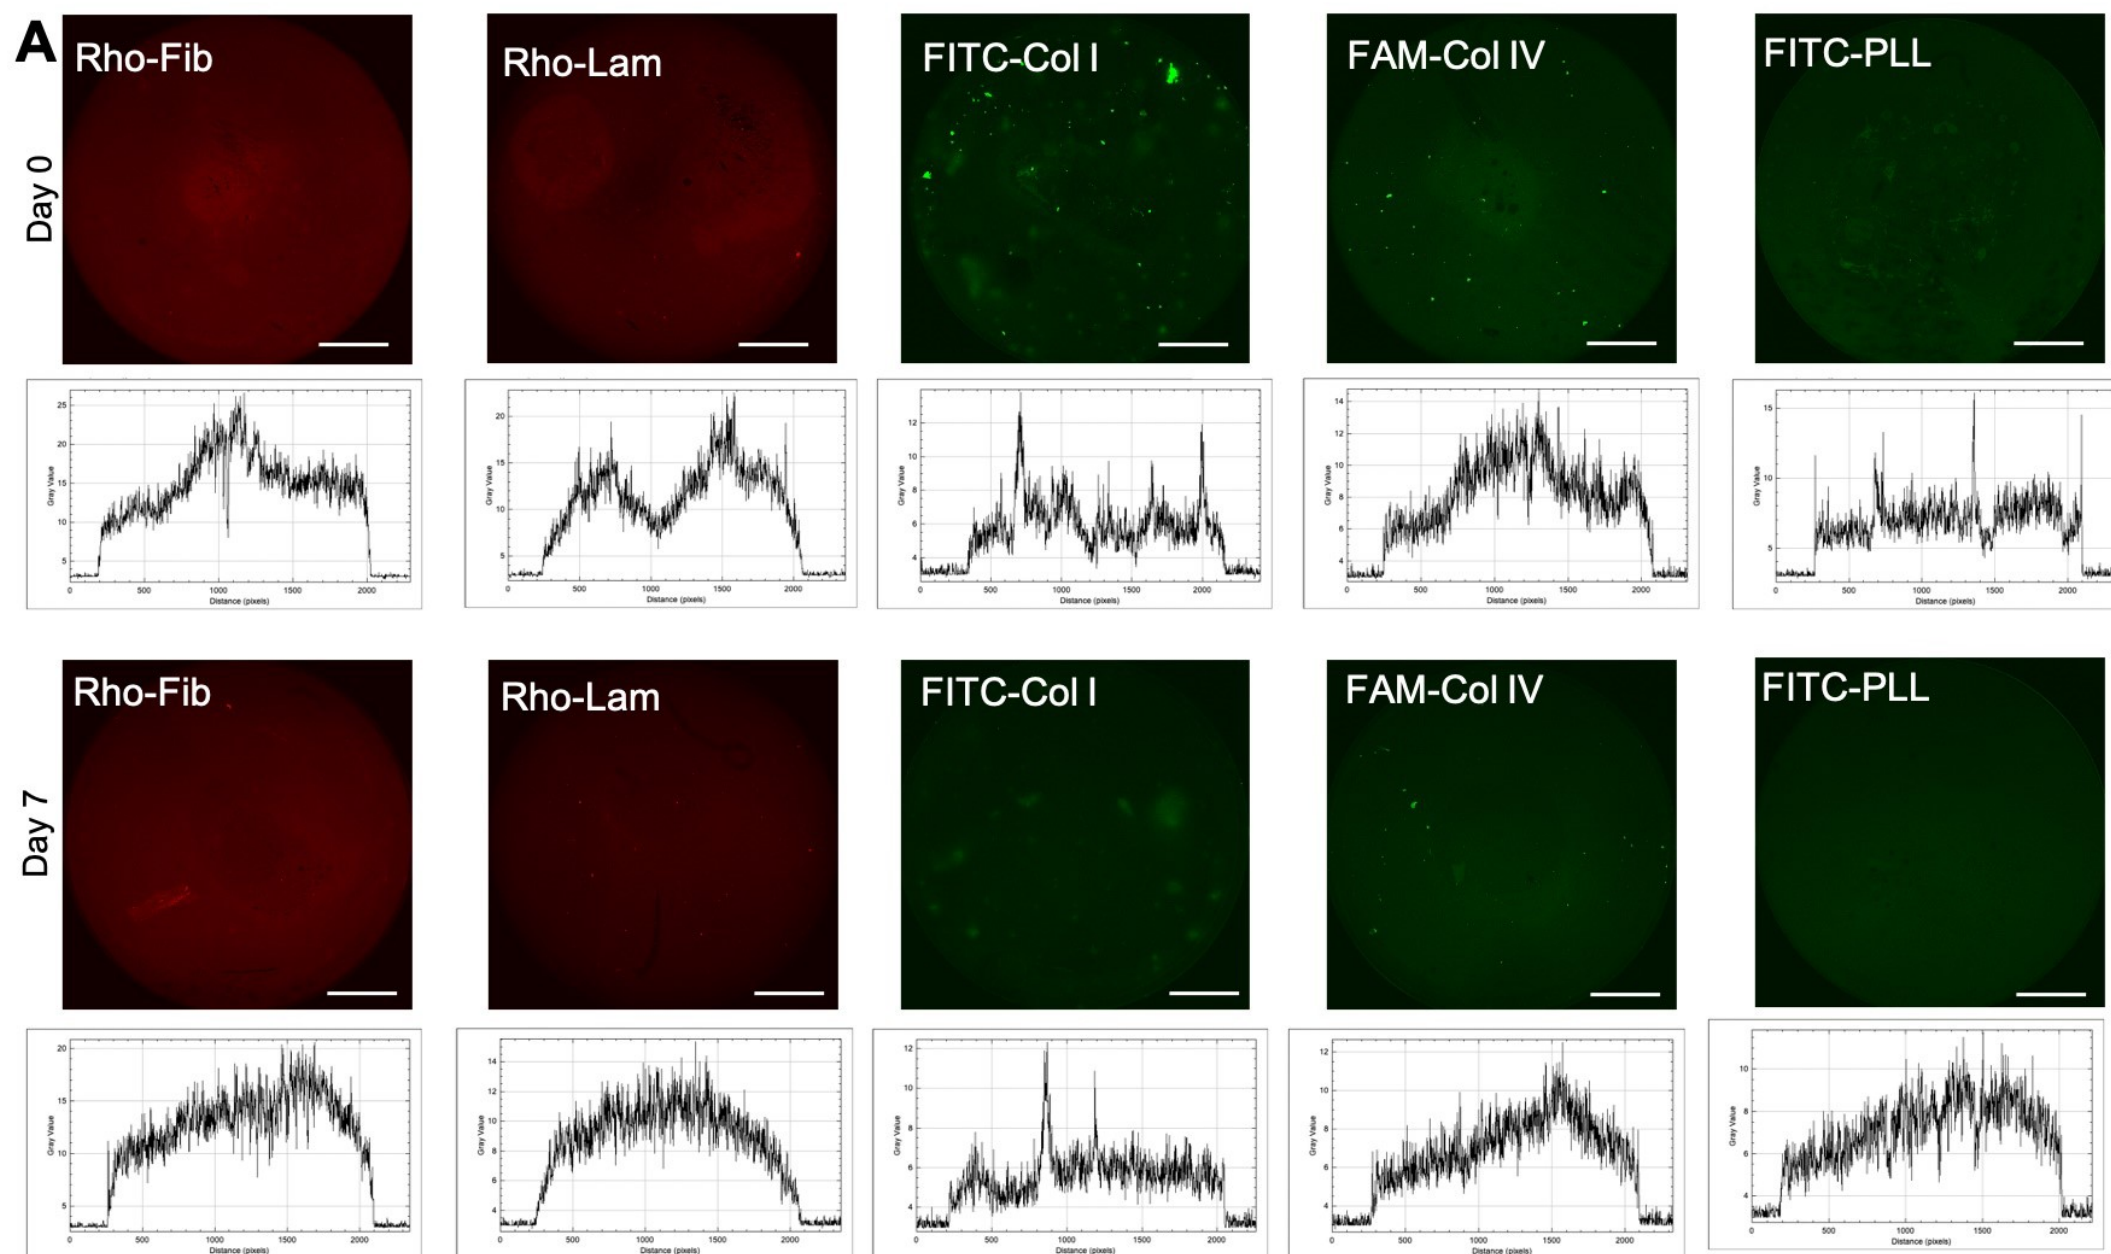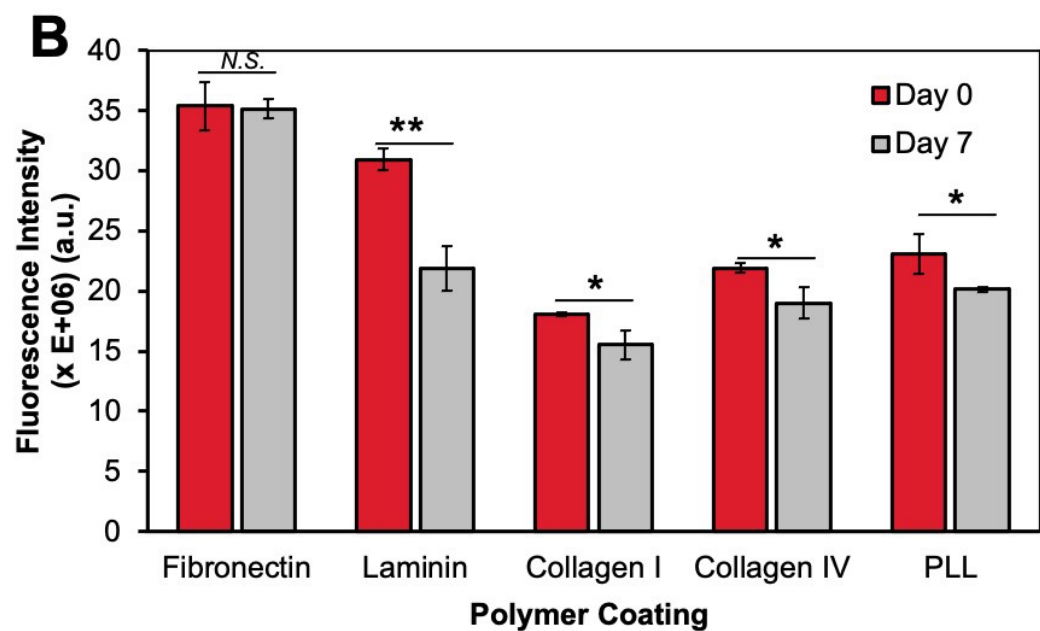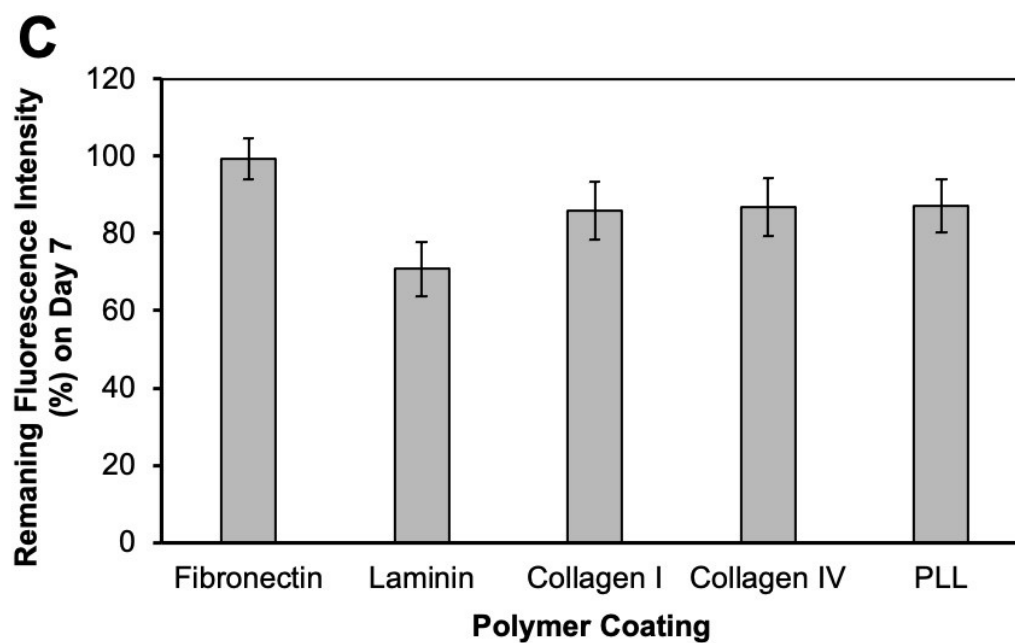

Supplement: d3bm00934c9.pdf [file d3bm00934c9.pdf]
